# Supplementary material
Source: Springer Nature journal article supplement (https://www.springermedizin.de/resource/supplementary/13195_2013_272_MOESM5_ESM.pdf/9688380)

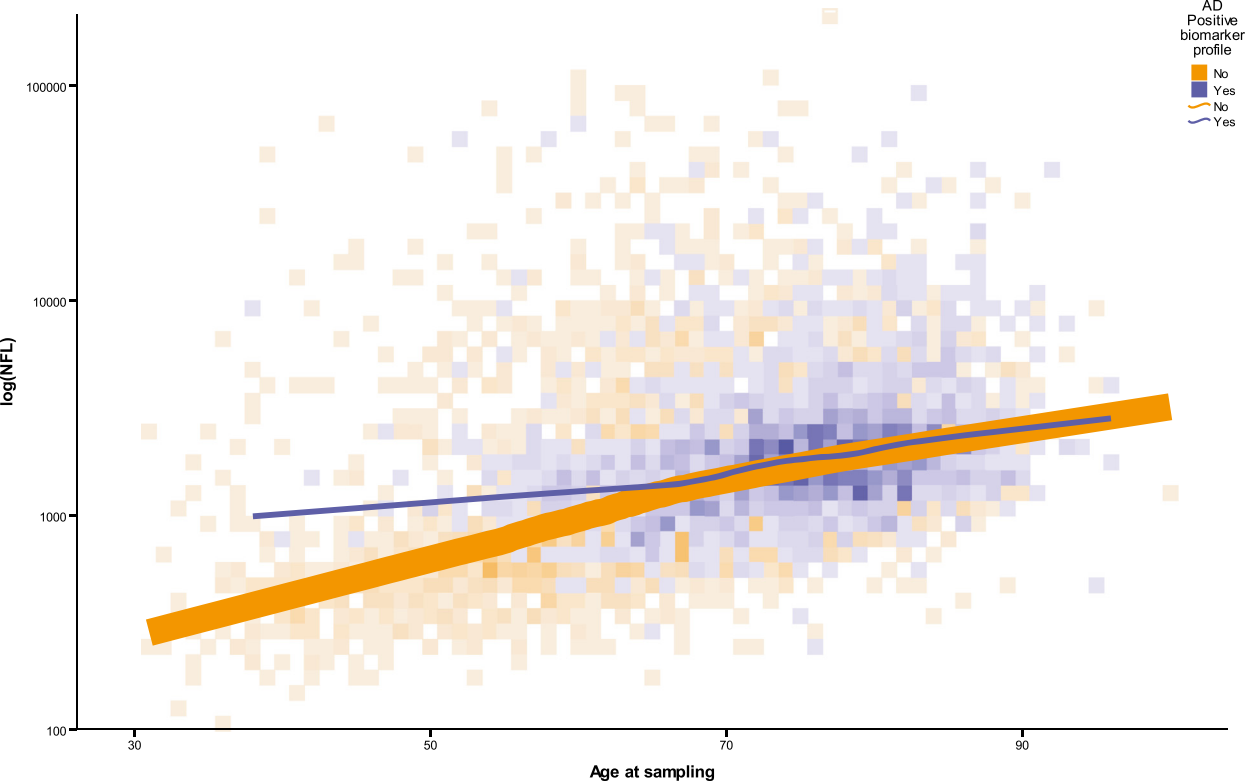

Supplement: MOESM5 [file 9688380]
